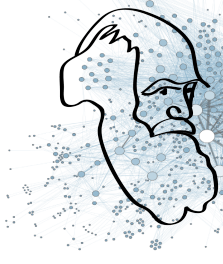

# Peer Community In Evolutionary Biology

Bacigalupe L, Gaitan-Espitia JD, Barria AM, Gonzalez-Mendez A, Ruiz-Aravena M, Mark Trinder M and Sinervo B. 2018. **Natural selection on plasticity of thermal traits in a highly seasonal environment.**  
*bioRxiv*, 191825, <https://doi.org/10.1101/191825>

**An article reviewed and recommended by *Peer Community In Evolutionary Biology*:**

<http://dx.doi.org/10.24072/pci.evolbiol.100048>

1 **Natural selection on plasticity of thermal traits in a highly seasonal**  
2 **environment**

3

4 Leonardo D. Bacigalupe<sup>1\*</sup>, Juan D. Gaitan-Espitia<sup>2,3</sup>, Aura M. Barria<sup>1</sup>, Avia Gonzalez-Mendez<sup>1</sup>,  
5 Manuel Ruiz-Aravena<sup>4</sup>, Mark Trinder<sup>5</sup> and Barry Sinervo<sup>6\*</sup>

6

7 <sup>1</sup>Instituto de Ciencias Ambientales y Evolutivas, Facultad de Ciencias, Universidad Austral de  
8 Chile, Casilla 567, Valdivia, Chile

9

10 <sup>2</sup>The Swire Institute of Marine Science and School of Biological Sciences, The University of  
11 Hong Kong, Hong Kong SAR, China

12

13 <sup>3</sup>CSIRO Oceans and Atmosphere, GPO Box 1538, Hobart 7001, TAS, Australia

14

15 <sup>4</sup>School of Natural Sciences, College of Sciences and Engineering, University of Tasmania,  
16 Hobart, Tasmania, Australia

17

18 <sup>5</sup>MacArthur Green, 95 South Woodside Road, Glasgow, UK

19

20 <sup>6</sup>Department of Ecology and Evolutionary Biology, University of California, Santa Cruz, CA,  
21 95064, USA

22 \*Both authors contributed equally to this work

23 Correspondence should be addressed to L.D.B (+5663 2293567, [lbacigal@gmail.com](mailto:lbacigal@gmail.com))

24 **Abstract**

25           This preprint has been reviewed and recommended by Peer Community In Evolutionary  
26 Biology (<http://dx.doi.org/10.24072/pci.evolbiol.100048>). For ectothermic species with broad  
27 geographical distributions, latitudinal/altitudinal variation in environmental temperatures  
28 (averages and extremes) are expected to shape the evolution of physiological tolerances and the  
29 acclimation capacity (i.e., degree of phenotypic plasticity) of natural populations. This can create  
30 geographical gradients of selection in which environments with greater thermal variability (e.g.,  
31 seasonality) tend to favour individuals that maximize performance across a broader range of  
32 temperatures compared to more stable environments. Although thermal acclimation capacity  
33 plays a fundamental role in this context, it is unknown whether natural selection targets this trait  
34 in natural populations. Here we addressed such an important gap in our knowledge by measuring  
35 survival, through mark recapture integrated into an information-theoretic approach, as a function  
36 of the plasticity of critical thermal limits for activity, behavioural thermal preference and the  
37 thermal sensitivity of metabolism in the northernmost population of the four-eyed frog  
38 *Pleurodema thaul*. Overall, our results indicate that thermal acclimation in this population is not  
39 being targeted by directional selection, although there might be signals of selection on individual  
40 traits. According to the most supported models, survival decreased in individuals with less  
41 tolerance to cold when cold-acclimated (probably because daily low extremes are frequent  
42 during the cooler periods of the year) and increased with body size. However, in both cases, the  
43 directional selection estimates were non-significant.

44

45 **Keywords:** Amphibians, natural selection, physiological plasticity, acclimation, *Pleurodema*  
46 *thaul*, Atacama Desert

## 47 **Introduction**

48           It is well known that environmental temperature ( $T_a$ ) is the abiotic factor with major  
49 incidence in the evolution, ecology and physiology of most of the biodiversity in the planet  
50 (Angilletta 2009 and references therein). The effects of  $T_a$  are particularly relevant for  
51 ectotherms as their body temperature depends on  $T_a$  and therefore any change in  $T_a$  affects their  
52 fitness and performance (e.g. behaviour, growth, reproduction, metabolism). This relationship  
53 between performance and temperature has been described by a thermal performance curve (TPC)  
54 (Huey & Berrigan 2001; Angilletta 2009) which has often been used to describe the thermal  
55 ecology and evolution of ectotherms (Gilchrist 1995; Huey & Kingsolver 1989), their phenotypic  
56 plasticity (Schulte et al. 2011), and to predict their responses to climate change (Clusella-Trullas  
57 et al. 2011; Sinclair et al. 2016). The TPC is best captured by three parameters: a minimum  
58 critical temperature ( $CT_{Min}$ ), which represents  $T_a$  below which performance is minimum; a  
59 maximum critical temperature ( $CT_{Max}$ ), which represents  $T_a$  above which performance is also  
60 minimum and an optimum temperature ( $T_{Opt}$ ), which represents  $T_a$  at which performance is  
61 maximum. Most of these parameters can exhibit geographic variation depending on the  
62 particular environmental context (e.g., local climate) and genetic background of populations  
63 (Gilchrist 1996; Kingsolver et al. 2004; Latimer et al. 2011). Furthermore, this geographic  
64 variation has the potential to create gradients of selection for TPCs across the species distribution  
65 (Kingsolver & Gomulkiewicz 2003) shaping thermal sensitivities, tolerances and thermal  
66 acclimation capacities (i.e., thermal plasticity) of local populations (Seebacher et al. 2012;  
67 Gaitan-Espitia et al. 2014).

68           Different climate-related hypotheses have been proposed to explain how physiological  
69 tolerances, capacities and their plasticity affect the distributional ranges of species (Bozinovic et

70 al. 2011). One of them, the climate variability hypothesis (CVH), offers a powerful conceptual  
71 framework to explore the interactions between environmental variability and physiological  
72 performance of ectotherms (e.g., Gaitan-Espitia et al. 2013; 2014). The CVH predicts that  
73 organisms inhabiting more variable environments should have broader ranges of environmental  
74 tolerance and/or greater physiological plasticity that enable them to cope with the fluctuating  
75 environmental conditions (e.g., seasonality) (Ghalambor et al. 2006; Gaitan-Espitia et al. 2017).  
76 In agreement with this hypothesis, other theoretical models have explored the evolutionary  
77 mechanisms underlying local thermal adaptation across heterogeneous environments (e.g.,  
78 Generalist-Specialist models). For instance, the model developed by Lynch and Gabriel (1987),  
79 predicts that temporal environmental heterogeneity selects for more broadly adapted individuals,  
80 whereas in more constant environments the model developed by Gilchrist (1995), predicts that  
81 selection should favor thermal specialists with narrow performance breadth. The mechanistic  
82 understanding of these conceptual frameworks has improved with recent studies showing how in  
83 thermally variable environments directional selection acts on TPC's parameters favoring  
84 organisms that maximize performance across a broader range of temperatures (Logan et al. 2014)  
85 despite the ability of ectotherms to thermoregulate behaviorally (Buckley et al. 2015).  
86 Notwithstanding this progress, whether natural selection targets thermal acclimation capacity  
87 (i.e., plasticity) itself in natural populations remains unknown.

88         In addition to increasing mean temperatures, it is known that climate change is changing  
89 the frequency and intensity of extreme temperatures and events (Rahmstorf & Coumou 2011;  
90 Wang & Dillon 2014; Vazquez et al. 2016). This, in turn, suggests that both averages and  
91 variances will have an important impact on different performance related traits (e.g. Lardies et al.

92 2014; Vasseur et al. 2014; Bartheld et al. 2017). Nevertheless, we still do not know whether  
93 selection might also target traits as a function of those extremes.

94         In this context, populations inhabiting highly seasonal environments characterized also by  
95 daily extreme temperatures, provide a natural laboratory to evaluate the role of natural selection  
96 on the plasticity of critical thermal limits and preferences. We addressed such important gaps in  
97 our knowledge by measuring for the first time survival as a function of the plasticity of thermal  
98 critical temperatures ( $CT_{Max}$  and  $CT_{Min}$ ), preferred temperature ( $T_{Pref}$ ) and thermal sensitivity of  
99 metabolism ( $Q_{10}$ ; the magnitude of change in metabolic rate for a 10°C change in  $T_a$ ) after  
100 acclimation to 10°C and 20°C in the northernmost population of the four-eyed frog *Pleurodema*  
101 *thaul*. We tested four predictions regarding phenotypic selection and plasticity that built up from  
102 previous findings showing that acclimation to warmer temperatures produces an increase in the  
103 upper but not in the lower limits of the thermal performance curve (Ruiz-Aravena et al. 2014)  
104 (Fig. 1). First, the high seasonality should select for plasticity in TPC parameters and therefore,  
105 the plasticity itself should currently be under directional selection. Second, if daily high extreme  
106 temperatures were frequent, then we would expect positive directional selection on  $CT_{max}$  when  
107 warm as well as cold acclimated. Third, if daily low extremes were frequent, then we would  
108 expect negative directional selection on  $CT_{min}$  during the cooler periods of the year. Fourth, as  
109 energy inputs are limited, the energetic definition of fitness indicates that individuals with higher  
110 maintenance costs (i.e. resting metabolic rate) would have less energy available to allocate to  
111 growth, reproduction and/or performance. The main prediction of this principle is that natural  
112 selection should maximize the residual available energy, and therefore, higher maintenance costs  
113 would be associated with lower fitness if no compensations in other functions occur (Bacigalupe

114 & Bozinovic 2002; Artacho & Nespolo 2009). Thus, our final prediction is that  $Q_{10}$  is not under  
115 directional selection.

116

## 117 **METHODS**

### 118 *Study organism and laboratory maintenance*

119 Eighty-three adults individuals of *P. thaul* were captured during September 2012 on two  
120 small ponds at Carrera Pinto (27°06'40.2'' S, 69°53'44.3'' W; 2,000 m.a.s.l.), a small oasis in the  
121 Atacama Desert that is known to be the northernmost population of the species (Correa et al.  
122 2007). In both ponds, we performed an exhaustive search across microhabitats (below rocks, in  
123 the vegetation and in the water). All individuals were transported to the laboratory (Universidad  
124 Austral de Chile, Valdivia) within 2 – 3 days of capture. Following capture all animals were  
125 marked by toe clipping and maintained in the laboratory for one month at a temperature of  $20^{\circ} \pm$   
126  $2^{\circ}\text{C}$  and with a photoperiod 12D:12L. Animals were housed ( $N = 5$ ) in terraria (length x width x  
127 height: 40 x 20 x 20 cm) provided with a cover of moss and vegetation and a small recipient  
128 filled with water. Individuals were fed once a week with mealworms (*Tenebrio sp.* larvae) and  
129 Mazuri® gel diets.

130

### 131 *Acclimation and thermal traits*

132 After one month at maintenance conditions, in a split cross design half the frogs were  
133 acclimated to either  $10^{\circ}\text{C}$  or  $20^{\circ}\text{C}$  for two weeks before measuring thermal traits. Frogs were  
134 randomly assigned to the first acclimation temperature using a coin. Next they were acclimated  
135 to the other temperature and again measured thermal traits. We chose these acclimation  
136 temperatures because they are close to the mean minimum temperatures during the breeding

137 season (August - October, 10°C) and to the mean temperatures during the active period of the  
138 species (20°C) at Carrera Pinto ([www.cr2.cl](http://www.cr2.cl)). None of the investigators were blinded to the  
139 group allocation during the experiments.

140 Critical temperatures were determined as the environmental temperature at which an  
141 individual was unable to achieve an upright position within 1 minute (Ruiz-Aravena et al. 2014).  
142 Each individual was placed in a small chamber inside a thermo-regulated bath (WRC-P8,  
143 Daihan, Korea) at 30°C ( $CT_{Max}$ ) or 5°C ( $CT_{Min}$ ) for 15 minutes, after which the bath temperature  
144 was increased (or decreased) at a rate of 0.8°C per minute (Rezende et al. 2011). Every minute or  
145 at every 1°C change, the chamber was turned upside down and we observed if the animal was  
146 able to return to the upright position. When an animal was unable to achieve an upright position  
147 within 1 minute it was allowed to recover at ambient temperature ( $CT_{Min}$ ) or for 30 minutes in a  
148 box with ice packs ( $CT_{Max}$ ). Body mass (a proxy of body size) was obtained before each trial  
149 using a Shimadzu TX323L electronic balance.

150 Preferred temperature ( $T_{Pref}$ ) was determined simultaneously for five individuals in five  
151 open-top terraria (length x width x height: 85 x 12 x 30 cm). Each terrarium had a thermal  
152 gradient between 10°C and 30°C produced by an infrared lamp overhead (250 W) on one end,  
153 and ice packs on the other. The organic gardening soil was moisturized at the beginning of each  
154 trial to prevent the desiccation of the frogs. Five individuals were placed at the centre of each one  
155 of the terraria and 45 minutes later we registered  $T_{Pref}$  as the dorsal body temperature ( $T_b$ ) using a  
156 UEi INF155 Scout1 infrared thermometer. Dorsal and cloacal  $T_b$  are highly associated ( $r_P =$   
157 0.99) (see Ruiz-Aravena et al. 2014 for details). Body mass was obtained before each trial using  
158 a Shimadzu TX323L electronic balance.



159 Standard metabolic rate, measured through oxygen consumption at 20°C and 30°C was  
160 measured continuously using an infrared O<sub>2</sub> - CO<sub>2</sub> analyzer (LI-COR LI6262, Lincoln, NV,  
161 USA). The analyzer was calibrated periodically against a precision gas mixture. Although there  
162 was almost no difference between calibrations, baseline measurements were performed before  
163 and after each recording. Flow rates of CO<sub>2</sub> – free air was maintained at 100 ml min<sup>-1</sup> ± 1% by a  
164 Sierra mass flow controller (Henderson, NV, USA). We used cylindrical metabolic chambers (60  
165 ml) covered by metal paper. O<sub>2</sub> consumption was recorded during 45 minutes per individual.  
166 Each record was automatically transformed by a macro program recorded in the ExpeData  
167 software (Sable Systems), to (1) transform the measure from % to mlO<sub>2</sub> min<sup>-1</sup>, taking into  
168 account the flow rate and (2) to eliminate the first 5 min of recordings. For each individual, the  
169 metabolic sensitivity (Q<sub>10</sub>) was calculated as the ratio between metabolic rate measured at 30°C  
170 and metabolic rate measured at 20°C.

171

### 172 *Selection on thermal traits*

173 After the experiments, all frogs were put back to 20°C for at least one month before  
174 releasing them. Marked frogs were released at Carrera Pinto in April 2013 and their survival was  
175 monitored on three separate recapture efforts (13<sup>th</sup> October 2013, 13<sup>th</sup> June and 9<sup>th</sup> September  
176 2014). As the desert surrounds these two small ponds dispersal was not a concern.  
177 The relationship between trait plasticity and survival was analyzed using a Cormack-Jolly-Seber  
178 (CJS) framework in Program MARK. An overall goodness of fit test was run using U-Care to  
179 ensure the data were consistent with the assumed structure of the CJS model and to obtain a  
180 value for the over dispersion parameter (c-hat). The time interval between capture occasions (as  
181 a fraction of 1 year and considering also the original capture event) was included in the analysis

182 to accommodate the unequal intervals. The resulting resighting and survival estimates were  
183 therefore corrected to annual estimates. Survival and resighting parameters were obtained in a  
184 two-stage process. First, the best-fit resighting model was identified from three candidate models  
185 (constant, time dependent, and a linear trend). The fit of the three candidate resighting models  
186 was compared using survival modeled as both a constant and a time-dependent rate, to ensure  
187 that selection of the best-fit resighting model was not influenced by choice of survival model.  
188 Once the best-fit resighting model was identified (using AICc), it was then retained for all  
189 candidate models. A model selection and an information-theoretic approach (Burnham &  
190 Anderson 2003) was employed to contrast the adequacy of different working hypotheses (the  
191 candidate models) of selection on trait plasticity. The number of candidate models was kept to a  
192 minimum to minimize the likelihood of spurious results (Burnham & Anderson 2003; Lucaks et  
193 al. 2010). Body mass showed a positive relationship with  $CT_{Max\_20}$  ( $r_P = 0.47$ ) and with  $T_{Pref\_10}$   
194 ( $r_P = 0.24$ ) but was not associated with any other trait (results not shown). Therefore, we tested  
195 only for a null model (i.e. neither trait under selection), a model with body mass and models with  
196 directional selection for each trait separately and also for correlational selection (interaction of  
197 trait combinations) in the same trait at both acclimation temperatures, which indicates plasticity.  
198 Body mass was included as a covariate in the case of  $CT_{Max\_20}$  and  $T_{Pref\_10}$  (Table 1). All analyses  
199 were performed in R version 3.1.3 employing package RMark (Laake 2013). No transformation  
200 was required to meet assumptions of statistical tests. Survival in relation to each covariate was  
201 obtained as the model averaged value across all candidate models weighted by individual model  
202 probability (Table 1).

203

204

205 **RESULTS**

206 All measured traits including critical thermal limits ( $CT_{Max}$ ,  $CT_{Min}$ ), thermal preference  
207 ( $T_{Pref}$ ) and sensitivity of metabolic rate to temperature ( $Q_{10}$ ) showed high variance among  
208 individuals (Fig. 2). In addition, for all traits some individuals shifted their thermal traits to  
209 higher values when acclimated to high temperatures, but other individuals showed the reverse  
210 response, that is their traits shifted to lower values after acclimation at higher temperatures (Fig.  
211 3).

212 Only 5 out of 28 correlations between physiological traits were statistically significant,  
213 and these involved mostly critical thermal limits. In particular  $CT_{Max_{20}}$  was negatively correlated  
214 with  $CT_{Min_{10}}$  ( $r_P = -0.57$ ) and  $CT_{Max_{10}}$  ( $r_P = -0.41$ ) whilst it was positively correlated with  $Q_{10_{20}}$   
215 ( $r_P = 0.26$ ). Additionally,  $CT_{Max_{10}}$  was positively correlated with  $CT_{Min_{10}}$  ( $r_P = 0.31$ ) and  
216 negatively correlated with  $CT_{Min_{20}}$  ( $r_P = -0.25$ ).

217 The overall goodness of fit measure for the CJS model indicated a moderate level of  
218 over-dispersion ( $c\text{-hat} = 2.65$ ,  $P = 0.103$ ), however with only 3 recapture occasions it was not  
219 possible to identify an alternative starting model and the basic CJS model was adopted as the  
220 basis for subsequent model fitting, with unexplained over-dispersion controlled using the  $c\text{-hat}$   
221 adjustment. A constant resighting rate was the best-fit model irrespective of whether survival  
222 was modeled as a constant or time dependent rate (Table 1). Consequently, the constant rate-  
223 resighting model was retained for subsequent modeling of survival. The model selection  
224 procedure indicated that from the 13 candidate models tested, there was not a single best-fit one  
225 (Table 1). In particular, the null model was the most supported (Akaike weight of 0.220), whilst  
226 models including only directional selection on single traits still had some support, with a  
227 cumulative Akaike weight of almost 60% (Table 1). Models including correlational selection

228 (i.e. plasticity) showed rather weak empirical support (Table 1). Overall, survival decreased as  
229 values of most of the traits increased in both, warm and cold acclimated conditions (Table 2,  
230 Figure 4).

231

## 232 **DISCUSSION**

233 To understand how organisms adapt to highly fluctuating environments and whether they will be  
234 able to adaptively respond to current climate change, we need to evaluate whether selection in  
235 nature targets plasticity itself. Populations inhabiting highly seasonal environments that also  
236 experience daily extreme temperatures, provide excellent opportunities to test predictions of the  
237 fitness consequences of such thermal variation on the plasticity of critical thermal limits and  
238 preferences. Here, to the best of our knowledge for the first time, we studied natural selection on  
239 thermal acclimation capacity of performance ( $CT_{Max}$  and  $CT_{Min}$ ), metabolism ( $Q_{10}$ ) and  
240 behaviour ( $T_{Pref}$ ). Our results indicate that thermal acclimation in this population is not being  
241 targeted by directional selection, although there might be signals of selection on individual traits.  
242 In part, the relatively weak evidence for natural selection on this system might be a consequence  
243 of the small sample size we used ( $N = 83$ ), the few recaptures we carried out ( $n = 3$ ) and the  
244 relatively high value of  $\hat{c}$  in the analyses, which penalizes models on the basis of parameter  
245 number. This prevented us not only from evaluating more complex models (i.e. non linear  
246 selection) but also resulted in estimates of directional selection with rather large SEs and  
247 therefore with 95% confidence intervals that contained the zero in all cases.

248         Some theoretical models of thermal adaptation across heterogeneous environments (e.g.,  
249 climate variability hypothesis, generalist-specialist models) suggest that temporal environmental  
250 heterogeneity selects for more broadly adapted individuals (Lynch and Gabriel, 1987; Gilchrist

251 1995), favoring increased plasticity particularly in thermal tolerance traits (Gunderson &  
252 Stillman 2015). Based on these models we predicted that the high seasonality should select for  
253 high plasticity in thermal traits and therefore, the plasticity itself should currently be under  
254 directional selection. Our prediction turned out to be incorrect as models including plasticity  
255 showed relatively weak support.

256         Frogs of *P. tahul* in the Atacama Desert, the northernmost population of this species, are  
257 exposed to large daily and seasonal oscillations in environmental temperatures. The ratio  
258 between daily and annual thermal ranges (O'Donnell & Ignizio 2012) experienced by this  
259 extreme population (0.65) is ca. 15% higher than that of a population 2,000 km south (0.52),  
260 which experiences narrower daily environmental temperatures at the center of the species'  
261 distribution (Barria & Bacigalupe 2017). This means that the studied population experiences a  
262 daily variation that is almost 65% of its seasonal variation. This high daily variation, in  
263 combination with the fact that climate change is already changing the frequency and intensity of  
264 extreme temperatures (Rahmstorf & Coumou 2011; Wang & Dillon 2014; Vasquez et al. 2017),  
265 made us wonder whether selection in nature might also target thermal traits as a function of daily  
266 extremes. As the cooler end of the thermal performance curve did not change through acclimation  
267 to warmer temperatures (Ruiz-Aravena et al. 2014) we expected negative directional selection on  
268  $CT_{min}$  during the cooler but not the warmer periods of the year. Our results are in agreement with  
269 the trend specified by this prediction, as survival decreased as  $CT_{min}$  increased (i.e. less tolerance  
270 to cold) when cold-acclimated (albeit the estimate was non-significant), which was the second  
271 most supported model (Table 1).

272         Although acclimation produced an increase in the upper limits of the thermal  
273 performance curve in this population (Ruiz-Aravena et al. 2014), we expected positive

274 directional selection on  $CT_{max}$  when warm as well as cold-acclimated if daily high extreme  
275 temperatures were frequent. Our results do not offer support for this prediction: there was a slight  
276 trend for survival to decrease as  $CT_{max}$  increased under warm as well as under cold-acclimated  
277 conditions. However, in both cases estimates were not statistically different from zero.  
278 Nevertheless, this might suggest that selection could be favouring individuals that avoid hot  
279 microhabitats, possibly by means of behavioural responses (Ruiz-Aravena et al. 2014). Indeed,  
280 behavioural thermoregulation has been proposed as one key factor that prevents an evolutionary  
281 response to selection to raising temperatures (Kearney et al. 2009; Huey et al. 2012; Buckley et  
282 al. 2015). The fact that  $CT_{Max\_20}$  was negatively correlated with  $CT_{Min\_10}$  indicates that  
283 individuals with higher cold tolerance might be the ones avoiding hot microhabitats, which opens  
284 very interesting questions for further research.

285         Regarding the sensitivity of metabolism to temperature ( $Q_{10}$ ) we expected that  $Q_{10}$  not to  
286 be under directional selection. Our results are in (partial) agreement with that expectation, as the  
287 rate at which survival changed with changes in  $Q_{10}$  was very small (Fig. 4, Table 2), although the  
288 models with  $Q_{10}$  still showed some support (Table 1). Finally, we also expected no directional  
289 selection on  $T_{Pref}$  as we have previously shown that acclimation to warmer temperatures  
290 produced an increase in this trait (Ruiz-Aravena et al. 2014). Nevertheless, we found a non-  
291 significant trend showing that survival decreased, although at a very low rate, as  $T_{Pref}$  increased,  
292 which might suggest that selection favours those individuals that are able to avoid hot  
293 microhabitats.

294         Our results indicate a positive trend of survival with body size (although the directional  
295 selection estimate was non-significant), something that has been previously reported in the  
296 literature (Aubin-Horth et al. 2005; Iida & Fujisaki 2007; Crosby & Latta 2013; Delaney &

297 Warner 2017). This is somewhat unsurprising, given that body mass is known to be positively  
298 associated with several physiological traits that enhance performance (Castellano et al. 1999;  
299 Madsen & Shine 2000; Hurlbert et al. 2008; Shepherd et al. 2008; Luna et al. 2009) including  
300 plasticity itself (Whitman & Ananthakrishnan 2009). Our oasis population inhabits two highly  
301 isolated ponds where other anuran competitors have not been observed, but there might be a risk  
302 of predation by herons (*L.D.B. personal observation*), which could explain the positive selection  
303 for body size. Nevertheless, further experimental work is needed to evaluate this possibility.

304         It is important to mention that we here measured plasticity in only one life stage. Likely  
305 other ecological and physiological traits are also plastic in this species, and their responses to  
306 acclimation might differ, also among different life stages. However, we still consider our results  
307 show a signal and provide the first evidence that phenotypic plasticity is not an actual target of  
308 selection in nature, but that daily climate extremes might be selecting for higher tolerance.  
309 Nevertheless, further work including multiple traits and life stages and also in other populations,  
310 should help to strengthen the trends found here into further generic hypotheses to clarify the role  
311 of plasticity for the viability of ectotherm populations in nature.

312 **Acknowledgements.** We thank Nadia Aubin-Horth, Wolf Blanckenhorn, Dries Bonte, Ray Huey  
313 and Michael Logan for highly valuable comments on a previous version on the manuscript. LDB  
314 wish to acknowledge the friendship and great support of Don Demetrio and Sra. Blanca at  
315 Carrera Pinto's oasis.

316 **Data:** data is available for download from the CSIRO Data Access Portal  
317 (<https://data.csiro.au/dap/landingpage?pid=csiro:29733>) Doi: 10.4225/08/5a9727318bd0f

318

319 **Competing interests.** We declare we have no competing interests

320 **Author Contributions.** L.D.B conceptualized the study, designed the experimental procedures  
321 and carried out the experiment with A.M.B., A.G.M., M.R.A. and J.D.G.E; M.T., B.S. and L.D.  
322 B. analyzed the data and L.D.B., B.S. and J.D.G. wrote the paper with input from A.M.B and  
323 M.R.A.

324

325 **Funding.** Leonardo Bacigalupe acknowledges funding from FONDECYT grant 1150029. Barry  
326 Sinervo was supported by a Macrosystems grant (EF-1241848) from NSF. Aura Barria and  
327 Manuel Ruiz-Aravena were supported by a CONICYT Doctoral Fellowship.

328

329 **Ethics.** This study did not involve endangered or protected species and was carried out in strict  
330 accordance with the recommendations in the Guide for the Care and Use of Laboratory Animals  
331 of the Comisión Nacional de Investigación Científica y Tecnológica de Chile (CONICYT). All  
332 experiments were conducted according to current Chilean law. The protocol was approved by the  
333 Committee on the Ethics of Animal Experiments of the Universidad Austral de Chile.

334

335



336 **References**

- 337 Angilletta, M. J. 2009. Thermal Adaptation: a theoretical and empirical synthesis. Oxford, UK:  
338 Oxford University press.  
339
- 340 Artacho, P. & Nespolo, R. F. 2009 Natural selection reduces energy metabolism in the garden  
341 snail, *Helix aspersa* (*Cornu aspersum*). *Evolution* **63**, 1044–50.  
342
- 343 Aubin-Horth, N., Ryan, D. A. J., Good, S. P. & Dodson, J. J. 2005 Balancing selection on size:  
344 Effects on the incidence of an alternative reproductive tactic. *Evol. Ecol. Res.* **7**, 1171–  
345 1182.  
346
- 347 Bacigalupe, L. D. & Bozinovic, F. 2002 Design, limitations and sustained metabolic rate: lessons  
348 from small mammals. *J. Exp. Biol.* **205**, 2963–2970.  
349
- 350 Barria, A. M. & Bacigalupe, L. D. 2017 Intraspecific geographic variation in thermal limits and  
351 acclimatory capacity in a wide distributed endemic frog. *J. Therm. Biol.* **69**, 254–260.  
352
- 353 Bartheld, J. L., Artacho, J. P. & Bacigalupe, L. D. 2017. Thermal performance curves under  
354 daily thermal fluctuation: A study in helmeted water toad tadpoles. *J. Therm. Biol* **70**, 80-  
355 85.  
356
- 357 Bozinovic, F., Calosi, P. & Spicer, J. I. 2011. Physiological correlates of geographic range in  
358 animals. *Annu. Rev. Ecol. Evol. Syst.* **42**, 155-179.  
359
- 360 Buckley, L. B., Ehrenberger, J. C. & Angilletta, M. J. 2015. Thermoregulatory behaviour limits  
361 local adaptation of thermal niches and confers sensitivity to climate change. *Funct. Ecol.*  
362 **29**, 1038–1047.  
363
- 364 Burnham, K. P. & Anderson, D. R. 2003 *Model selection and multimodel inference: a practical*  
365 *information-theoretic approach*. Springer Science & Business Media.  
366
- 367 Castellano, S., Rosso, A., Doglio, S. & Giacoma, C. 1999. Body size and calling variation in the  
368 green toad (*Bufo viridis*). *J. Zool.* **248**, 83–90.  
369
- 370 Clusella-Trullas, S., Blackburn, T. M. & Chown, S. L. 2011. Climatic Predictors of Temperature  
371 Performance Curve Parameters in Ectotherms Imply Complex Responses to Climate  
372 Change. *Am. Nat.* **177**, 738-751.  
373
- 374 Correa, C., Sallaberry, M., Gonzalez, B., Soto, E. & Mendez, M. 2007 Amphibia, Anura,  
375 Leiuperidae, *Pleurodema thaul*: Latitudinal and altitudinal distribution extension in Chile.  
376 *Check List* **3**, 267–270  
377
- 378 Crosby, K. & Latta, R. G. 2013 A test of the reproductive economy hypothesis in plants: More  
379 offspring per capita come from large (not small) parents in *Avena barbata*. *Evol. Ecol.*  
380 **27**, 193–203.  
381

- 382 Delaney, D. M. & Warner, D. A. 2017 Effects of age- and sex-specific density on behaviour and  
383 survival in a territorial lizard (*Anolis sagrei*). *Anim. Behav.* **129**, 31–41.  
384
- 385 Gaitan-Espitia, J. D., Arias, M. B., Lardies, M. A. & Nespolo, R. F. 2013. Variation in thermal  
386 sensitivity and thermal tolerances in an invasive species across a climatic gradient:  
387 lessons from the land snail *Cornu aspersum*. *PLoS One*, 8(8), e70662  
388
- 389 Gaitan-Espitia, J. D., Bacigalupe, L. D., Opitz, T., Lagos, N. A., Timmermann, T. & Lardies, M.  
390 A. 2014. Geographic variation in thermal physiological performance of the intertidal crab  
391 *Petrolisthes violaceus* along a latitudinal gradient. *J. Exp. Biol.* **217**, 4379–4386.  
392
- 393 Gaitan-Espitia, J. D., Marshall, D. J., Dupont, S., Bacigalupe, L. D., Bodrossy, L. & Hobday, A.  
394 J. 2017. Geographical gradients in selection can reveal genetic constraints for  
395 evolutionary responses to ocean acidification. *Biol. Lett.* **13**, 20160784.  
396
- 397 Ghalambor, C. K., Huey, R. B., Martin, P. R., Tewksbury, J. T. & Wang, G. 2006. Are mountain  
398 passes higher in the tropics? Janzen's hypothesis revisited. *Integr. Comp. Biol.* **46**, 5–17.  
399
- 400 Gilchrist, G. W. 1995. Specialists and generalists in changing environments. 1. Fitness  
401 landscapes of thermal sensitivity. *Am. Nat.* **146**:252–270.  
402
- 403 Gilchrist, G. W. 1996. A quantitative genetic analysis of thermal sensitivity in the locomotor  
404 performance curve of *Aphidius ervi*. *Evolution* **50**, 1560–1572.  
405
- 406 Gunderson, A. R. & Stillman, J. H. 2015. Plasticity in thermal tolerance has limited potential to  
407 buffer ectotherms from global warming. *Proc. R. Soc. B* **282**, 20150401  
408
- 409 Huey, R. B. & Kingsolver, J. G. 1989. Evolution of thermal sensitivity of ectotherm  
410 performance. *Trends Ecol. Evol.* **4**, 131–135.  
411
- 412 Huey, R. B. & Berrigan, D. 1996 Testing evolutionary hypotheses of acclimation. In *Phenotypic  
413 and evolutionary adaptation to temperature* (eds A. Johnston & A. Bennett), pp. 205–  
414 237. Cambridge University Press  
415
- 416 Huey, R. B., Kearney, M. R., Krockenberger, A., Holtum, J. A. M., Jess, M. & Williams, S. E.  
417 2012. Predicting organismal vulnerability to climate warming: roles of behaviour,  
418 physiology and adaptation. *Philos. Trans. R. Soc. B Biol. Sci.* **367**, 1665–1679.  
419
- 420 Hurlbert, A. H., Ballantyne IV, F. & Powell, S. 2008 Shaking a leg and hot to trot: The effects of  
421 body size and temperature on running speed in ants. *Ecol. Entomol.* **33**, 144–154.  
422
- 423 Iida, H. & Fujisaki, K. 2007 Seasonal changes in resource allocation within an individual  
424 offspring of the wolf spider, *Pardosa pseudoannulata* (Araneae: Lycosidae). *Physiol.  
425 Entomol.* **32**, 81–86.  
426
- 427 Kingsolver, J. G. & Gomulkiewicz, R. 2003. Environmental Variation and Selection on

- 428 Performance Curves. *Integr. Comp. Biol.* **43**, 470–477.
- 429
- 430 Kearney, M., Shine, R. & Porter, W. P. 2009 The potential for behavioral thermoregulation to  
431 buffer ‘cold-blooded’ animals against climate warming. *Proc. Natl. Acad. Sci. U. S. A.*  
432 **106**, 3835–3840.
- 433
- 434 Kingsolver, J. G., Ragland, G. J. & Shlichta, J. G. 2004. Quantitative genetics of continuous  
435 reaction norms: thermal sensitivity of caterpillar growth rates. *Evolution* **58**,1521-1529.
- 436
- 437 Laake, J. 2013 RMark: an R interface for analysis of capture–recapture data with MARK. In  
438 *AFSC Processed Rep 2013-01*, pp. 25. Seattle, Washington, USA.: Alaska Fisheries  
439 Science Center, NOAA, National Marine Fisheries Service
- 440
- 441 Lardies, M. A., Arias, M. B., Poupin, M. J. & Bacigalupe, L. D. 2014. Heritability of *hsp70*  
442 expression in the beetle *Tenebrio molitor*: Ontogenetic and environmental effects. *J.*  
443 *Insect Physiol.* **67**, 70-75.
- 444
- 445 Latimer, C. A. L., Wilson, R. S. & Chenoweth, S. F. 2011. Quantitative genetic variation for  
446 thermal performance curves within and among natural populations of *Drosophila serrata*.  
447 *J. Evol. Biol.* **24**, 965–975.
- 448
- 449 Logan, M. L., Cox, R. M. & Calsbeek, R. 2014 Natural selection on thermal performance in a  
450 novel thermal environment. *Proc. Natl. Acad. Sci. U. S. A.* **39**, 14165-14169.
- 451
- 452 Lukacs, P., Burnham, K. & Anderson, D. 2010 Model selection bias and Freedman’s paradox.  
453 *Ann. Inst. Stat. Math.* **62**, 117–125
- 454
- 455 Luna, F., Antenucci, C. D. & Bozinovic, F. 2009 Comparative energetics of the subterranean  
456 *Ctenomys* rodents: breaking patterns. *Physiol. Biochem. Zool.* **82**, 226–35.
- 457
- 458 Lynch, M., and W. Gabriel. 1987. Environmental tolerance. *Am. Nat.* **129**:283–303.
- 459
- 460 Madsen, T. & Shine, R. 2000 Energy versus risk: costs of reproduction in free-ranging pythons  
461 in tropical Australia. *Austral Ecol.* **25**, 670–675.
- 462
- 463 O’Donnell, M. S. & Ignizio, D. A. 2012. Bioclimatic predictors for supporting ecological  
464 applications in the conterminous United States. Geological Survey Data Series 691.
- 465
- 466 Schulte, P. M., Healy, T. M. & Fangue, N. A. 2011. Thermal Performance Curves, Phenotypic  
467 Plasticity, and the Time Scales of Temperature Exposure. *Integr. Comp. Biol.* **51**, 691–  
468 702.
- 469
- 470 Rahmstorf, S. & D. Coumou. 2011. Increase of extreme events in a warming world. *Proc. Natl.*  
471 *Acad. Sci. U. S. A.* **108**,17905-17909.
- 472
- 473 Rezende, E. L., Tejedo, M. & Santos, M. 2011 Estimating the adaptive potential of critical

474 thermal limits: methodological problems and evolutionary implications. *Funct. Ecol.* **25**,  
475 111–121.  
476  
477 Ruiz-Aravena, M., Gonzalez-Mendez, A., Estay, S. A., Gaitán-Espitia, J. D., Barria-Oyarzo, I.,  
478 Bartheld, J. L. & Bacigalupe, L. D. 2014 Impact of global warming at the range margins:  
479 phenotypic plasticity and behavioral thermoregulation will buffer an endemic amphibian.  
480 *Ecol. Evol.* **4**, 4467–4475.  
481  
482 Seebacher, F., Holmes, S., Roosen, N. J., Nouvian, M., Wilson, R. S. & Ward, A. J. W. 2012.  
483 Capacity for thermal acclimation differs between populations and phylogenetic lineages  
484 within a species. *Funct. Ecol.* **26**, 1418–1428.  
485  
486 Shepherd, B. L., Prange, H. D. & Moczek, A. P. 2008. Some like it hot: Body and weapon size  
487 affect thermoregulation in horned beetles. *J. Insect Physiol.* **54**, 604–611.  
488  
489 Sinclair, B. J., Marshall, K. E., Sewell, M. A., Levesque, D. L., Willett, C. S., Slotsbo, S., Dong,  
490 Y., Harley, C. D. G., Marshall, D. J., Helmuth, B. S. & Huey, R. B. 2016. Can we predict  
491 ectotherm responses to climate change using thermal performance curves and body  
492 temperatures? *Ecol. Lett.* **19**, 1372–1385.  
493  
494 Vasseur, D. A., DeLong, J. P., Gilbert, B., Greig, H. S., Harley, C. D. G., McCann, K. S.,  
495 Savage, V., Tunney, T. D. & O'Connor, M. I. 2014. Increased temperature variation  
496 poses a greater risk to species than climate warming. *Proc. R. Soc. B.* **281**, 20132612.  
497  
498 Vázquez, D. P., Gianoli, E., Morris, W. F. & Bozinovic, F. 2017. Ecological and evolutionary  
499 impacts of changing climatic variability. *Biol. Rev.* **92**, 22–42.  
500  
501 Wang, G. & Dillon, M. E. 2014. Recent geographic convergence in diurnal and annual  
502 temperature cycling flattens global thermal profiles. *Nature Climate Change* **4**, 988–992.  
503  
504 Whitman, D. & Ananthakrishnan, T. 2009 *Phenotypic Plasticity of Insects: Mechanisms and*  
505 *Consequences*. Enfield: Science Publishers.  
506

507 **Figure 1.** Graphical representation of the theory tested in this study. (a) Predictions built up from  
 508 findings showing that acclimation to warmer temperatures produces an increase in the upper but  
 509 not in the lower limits of the thermal performance curve (Ruiz-Aravena et al. 2014). (b) The high  
 510 seasonality should selected for plasticity and therefore, plasticity of all traits should currently be  
 511 under directional selection. (c) If daily low extremes are frequent, negative directional selection  
 512 on  $CT_{Min}$  during the cooler periods of the year is expected (left panel). If daily high extreme  
 513 temperatures are frequent, positive directional selection on  $CT_{Max}$  during the warmer periods  
 514 (right panel) as well as the cooler periods of the year is expected (middle panel). We predict no  
 515 directional selection on  $T_{Pref}$  and  $Q_{10}$  at both acclimation temperatures and on  $CT_{Min}$  when warm  
 516 acclimated. Cold acclimation is indicated by a  $_{10}$  subscript while warm acclimation is indicated  
 517 by a  $_{20}$  subscript.

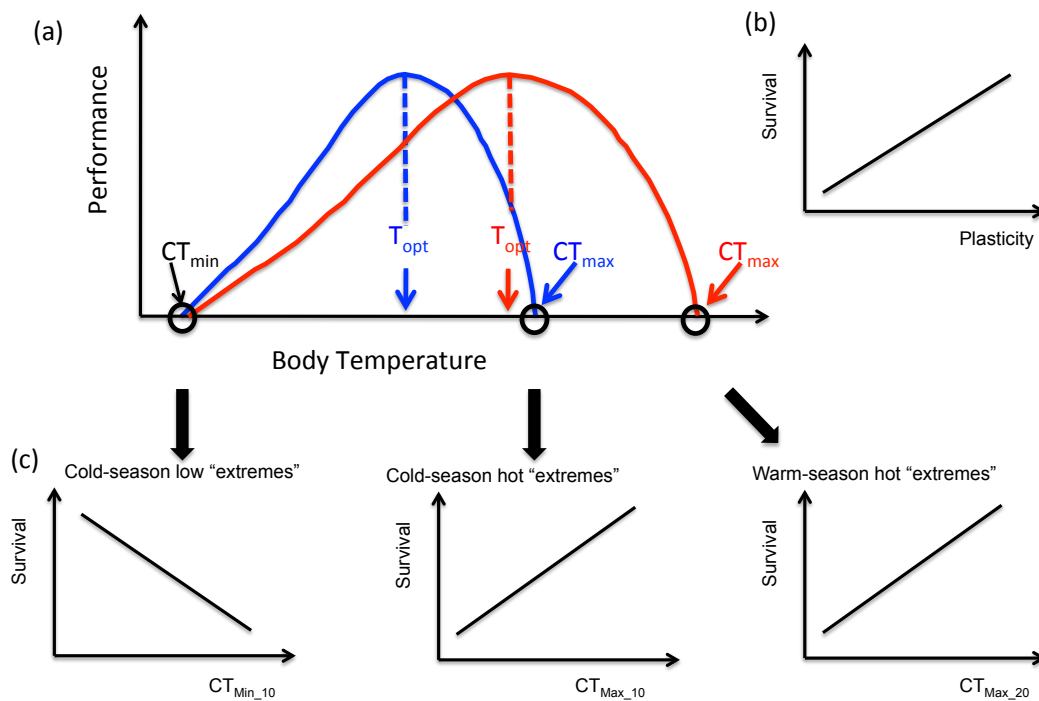

519 **Figure 2.** Frequency distribution of  $CT_{Min}$ ,  $T_{Pref}$  and  $CT_{Max}$  of the four-eyed frog when  
520 acclimated to 10°C and 20°C.

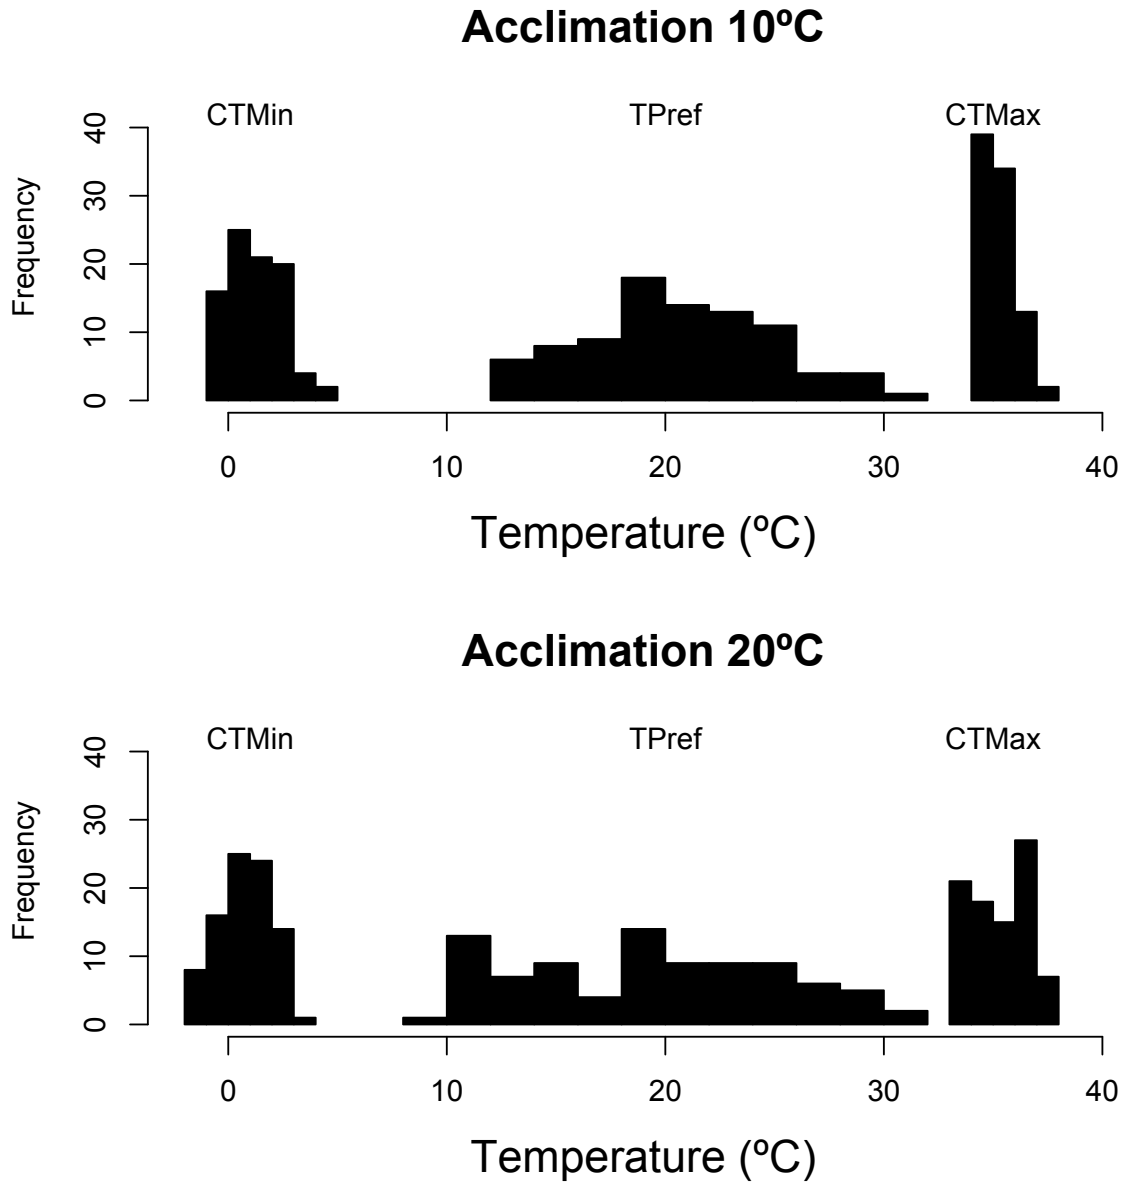

521

522

523 **Figure 3.** Individual plasticity in  $CT_{Min}$ ,  $T_{Pref}$ ,  $CT_{Max}$  and  $Q_{10}$  in response to 10 and 20°C  
524 acclimation treatments. Each line represents the individual value of the given trait at each  
525 acclimation temperature. For  $CT_{Min}$  and  $CT_{Max}$  the width of the line is directly proportional to the  
526 number of individuals that showed that specific response.

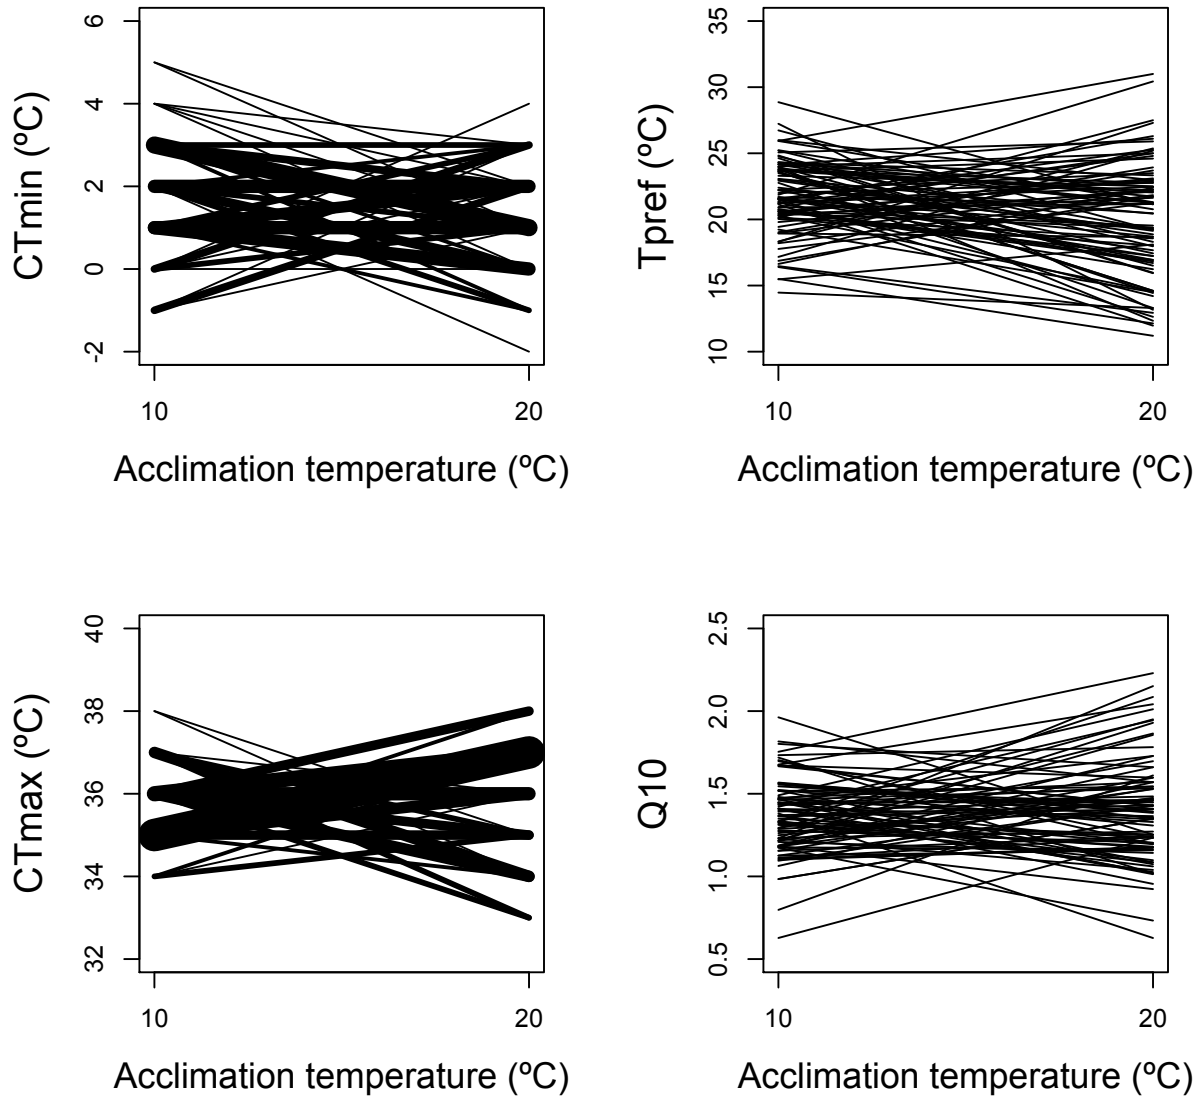

527  
528

529 **Figure 4.** Directional survival selection on various thermal traits sorted by model probabilities.

530  $w$ : Akaike weights of the model.

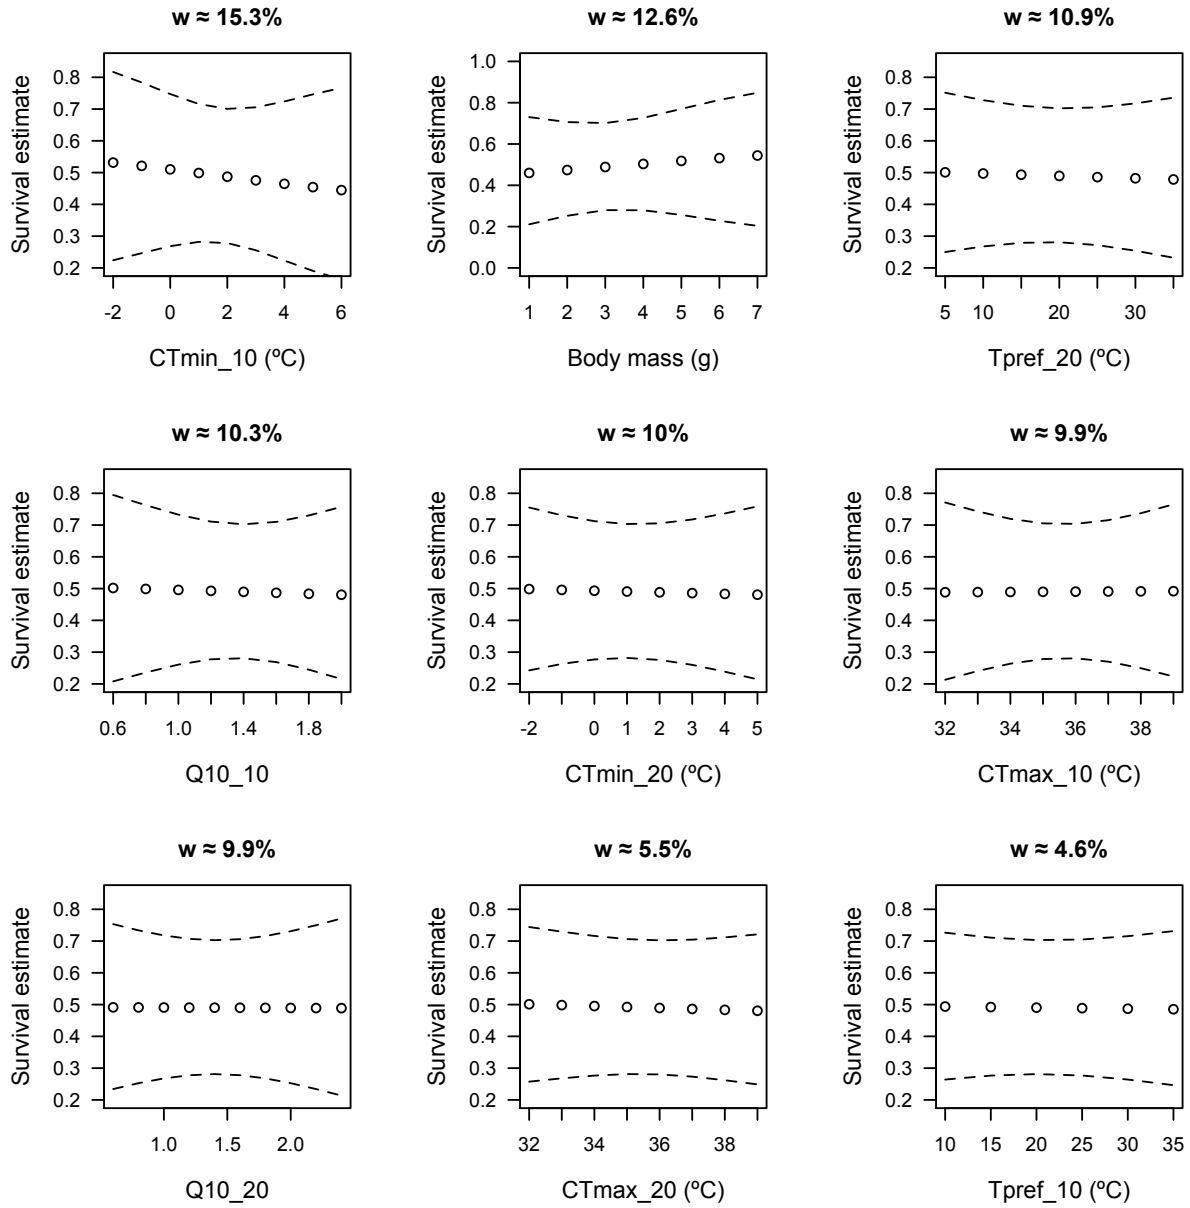

531



532 **Table 1.** Candidate models ordered accordingly to their Akaike weights. Single term models  
 533 represent directional selection (e.g.  $CT_{Max}$ ) and correlational selection represents plasticity (e.g.  
 534  $CT_{Max\_10} * CT_{Max\_20}$ ).  $CT_{Min}$  = minimum critical temperature;  $CT_{Max}$  = maximum critical  
 535 temperature;  $T_{Pref}$  = preferred temperature;  $Q_{10}$  = thermal sensitivity of metabolism; MB = body  
 536 mass. Cold acclimated is indicated by a  $\_10$  subscript while warm acclimated is indicated by a  
 537  $\_20$  subscript.  
 538

| Models                                                              | K | AICc   | $\Delta AICc$ | $w_i$ |
|---------------------------------------------------------------------|---|--------|---------------|-------|
| 1 Null model                                                        | 2 | 130.17 | 0             | 0.220 |
| 2 $CT_{Min\_10}$                                                    | 3 | 131.40 | 1.23          | 0.119 |
| 3 MB                                                                | 3 | 131.78 | 1.61          | 0.098 |
| 4 $T_{Pref\_20}$                                                    | 3 | 132.08 | 1.90          | 0.085 |
| 5 $Q_{10\_10}$                                                      | 3 | 132.18 | 2.01          | 0.081 |
| 6 $CT_{Min\_20}$                                                    | 3 | 132.25 | 2.08          | 0.078 |
| 7 $CT_{Max\_10}$                                                    | 3 | 132.26 | 2.08          | 0.078 |
| 8 $Q_{10\_20}$                                                      | 3 | 132.26 | 2.09          | 0.077 |
| 9 $CT_{Min\_10} + CT_{Min\_20} + CT_{Min\_10} * CT_{Min\_20}$       | 5 | 133.38 | 3.21          | 0.044 |
| 10 MB + $CT_{Max\_20}$                                              | 4 | 133.44 | 3.27          | 0.043 |
| 11 MB + $T_{Pref\_10}$                                              | 4 | 133.82 | 3.64          | 0.036 |
| 12 $Q_{10\_10} + Q_{10\_20} + Q_{10\_10} * Q_{10\_20}$              | 5 | 134.17 | 4.00          | 0.030 |
| 13 MB + $T_{Pref\_10} + T_{Pref\_20} + T_{Pref\_10} * T_{Pref\_20}$ | 6 | 137.16 | 6.99          | 0.007 |
| 14 MB + $CT_{Max\_10} + CT_{Max\_20} + CT_{Max\_10} * CT_{Max\_20}$ | 6 | 137.62 | 7.45          | 0.005 |

539  $K$  = number of parameters.  
 540 AICc: AIC values corrected for small sample sizes.  
 541  $w_i$ : Akaike weights.  
 542

543 **Table 2.** Directional selection estimates from single terms models with their standard errors (SE)  
 544 and 95% confidence intervals (95% CI).  $CT_{Min}$  = minimum critical temperature;  $CT_{Max}$  =  
 545 maximum critical temperature;  $T_{Pref}$  = preferred temperature;  $Q_{10}$  = thermal sensitivity of  
 546 metabolism; MB = body mass. Cold acclimation is indicated by a  $_{10}$  subscript while warm  
 547 acclimation is indicated by a  $_{20}$  subscript.  
 548

| Trait           | Estimate | SE    | 95% CI         |
|-----------------|----------|-------|----------------|
| MB              | 0.209    | 0.212 | -0.206 – 0.625 |
| $CT_{Min_{10}}$ | -0.248   | 0.187 | -0.616 – 0.119 |
| $CT_{Min_{20}}$ | -0.030   | 0.181 | -0.384 – 0.324 |
| $T_{Pref_{10}}$ | -0.025   | 0.059 | -0.140 – 0.090 |
| $T_{Pref_{20}}$ | -0.026   | 0.042 | -0.109 – 0.056 |
| $CT_{Max_{10}}$ | 0.026    | 0.257 | -0.477 – 0.530 |
| $CT_{Max_{20}}$ | -0.192   | 0.195 | -0.575 – 0.191 |
| $Q_{10_{10}}$   | -0.475   | 1.140 | -2.709 – 1.759 |
| $Q_{10_{20}}$   | -0.048   | 0.795 | -1.607 – 1.510 |

549

**Figure 1.** Graphical representation of the predictions tested in this study. (a) Predictions built up from findings showing that acclimation to warmer temperatures produces an increase in the upper but not in the lower limits of the thermal performance curve (Ruiz-Aravena et al. 2014). (b) The high seasonality should have selected for plasticity and therefore, plasticity of all traits should not currently be under directional selection. (c) If daily low extremes are frequent, we expect negative directional selection on  $CT_{Min}$  during the cooler periods of the year (left panel). If daily high extreme temperatures are frequent, we expect positive directional selection on  $CT_{Max}$  during the warmer periods (right panel) as well as the cooler periods of the year (middle panel). We predict no directional selection on  $T_{Pref}$  and  $Q_{10}$  at both acclimation temperatures and on  $CT_{Min}$  when warm acclimated. Cold acclimated is indicated by a  $_{10}$  subscript while warm acclimated is indicated by a  $_{20}$  subscript.

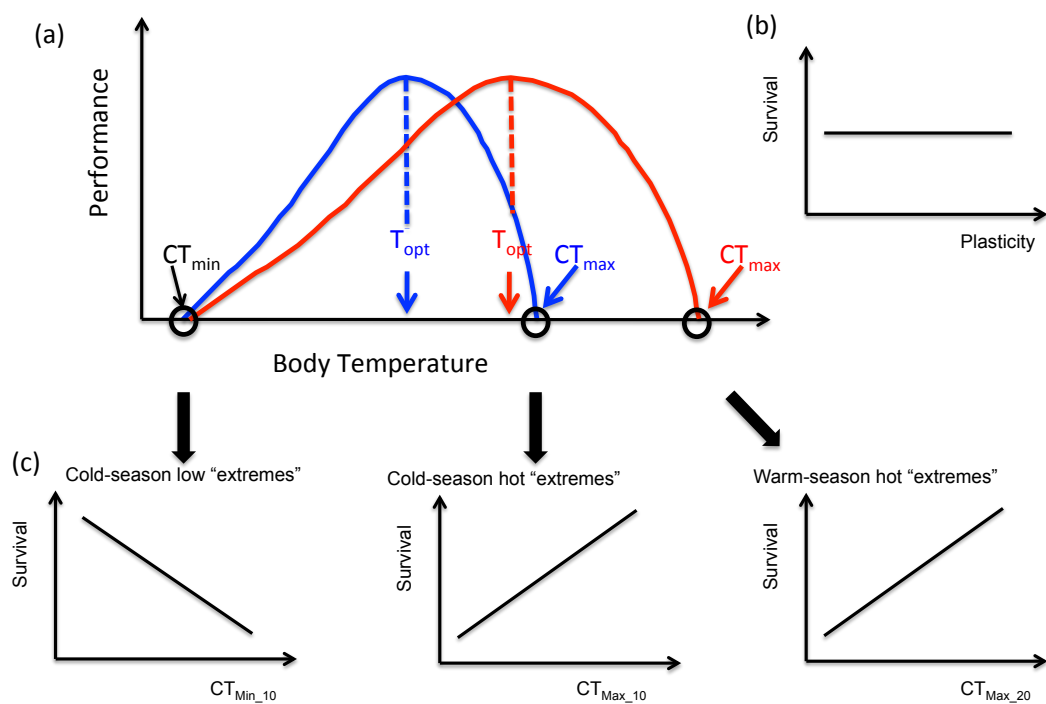

**Figure 2.** Frequency distribution of  $CT_{Min}$ ,  $T_{Pref}$  and  $CT_{Max}$  of the four-eyed frog when acclimated to 10°C and 20°C.

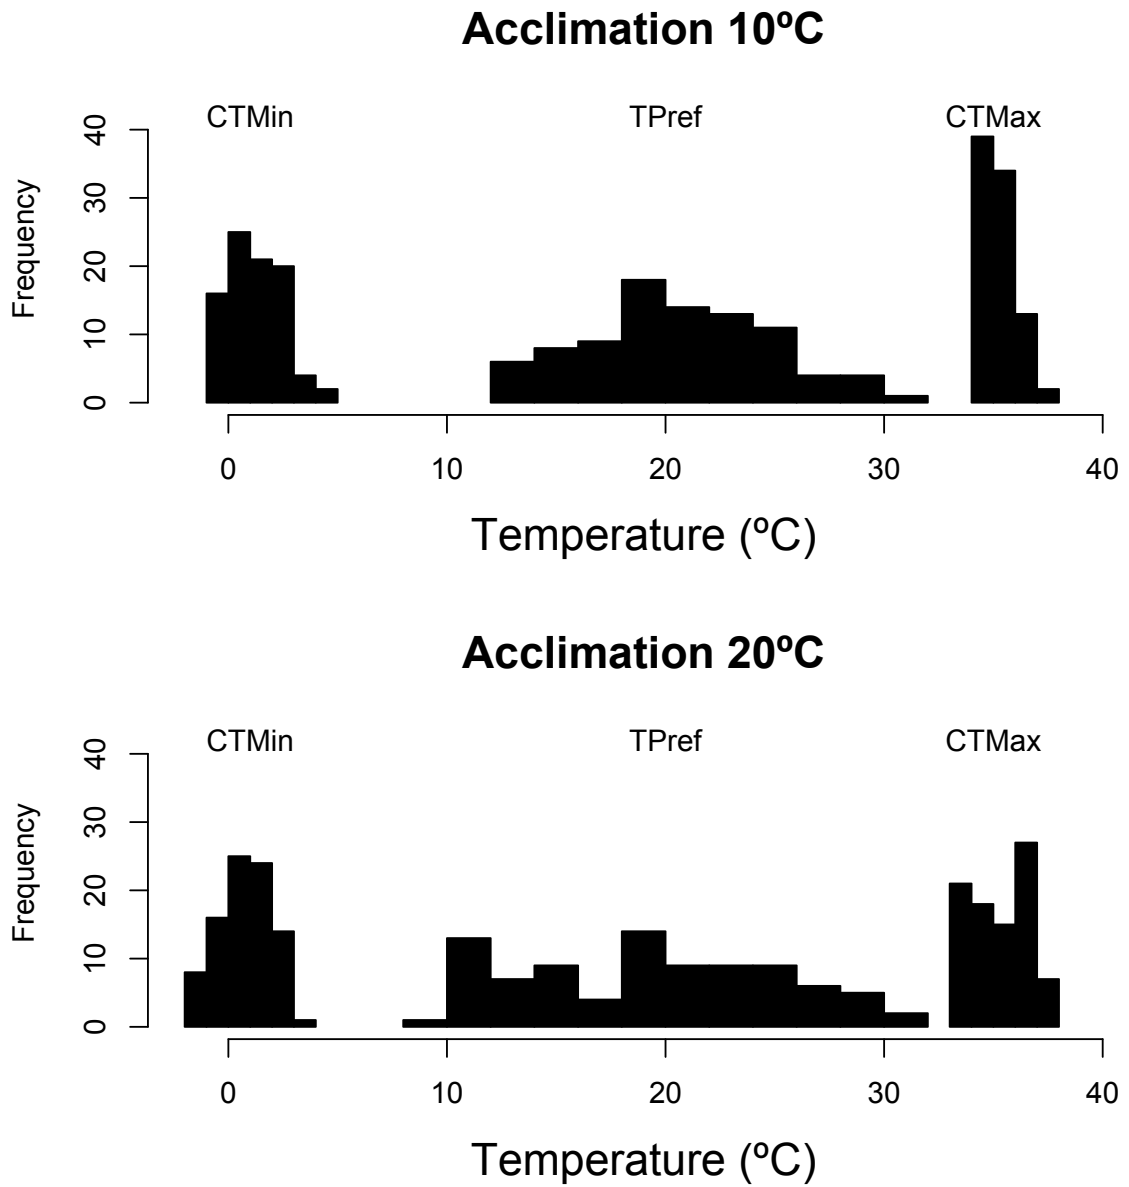

**Figure 3.** Individual plasticity in  $CT_{Min}$ ,  $T_{Pref}$ ,  $CT_{Max}$  and  $Q_{10}$  to 10 and 20°C acclimation treatments. Each line represents the individual value of the specific traits at each temperature. For  $CT_{Min}$  and  $CT_{Max}$  the width of the line is directly proportional to the number of individuals that showed that specific response.

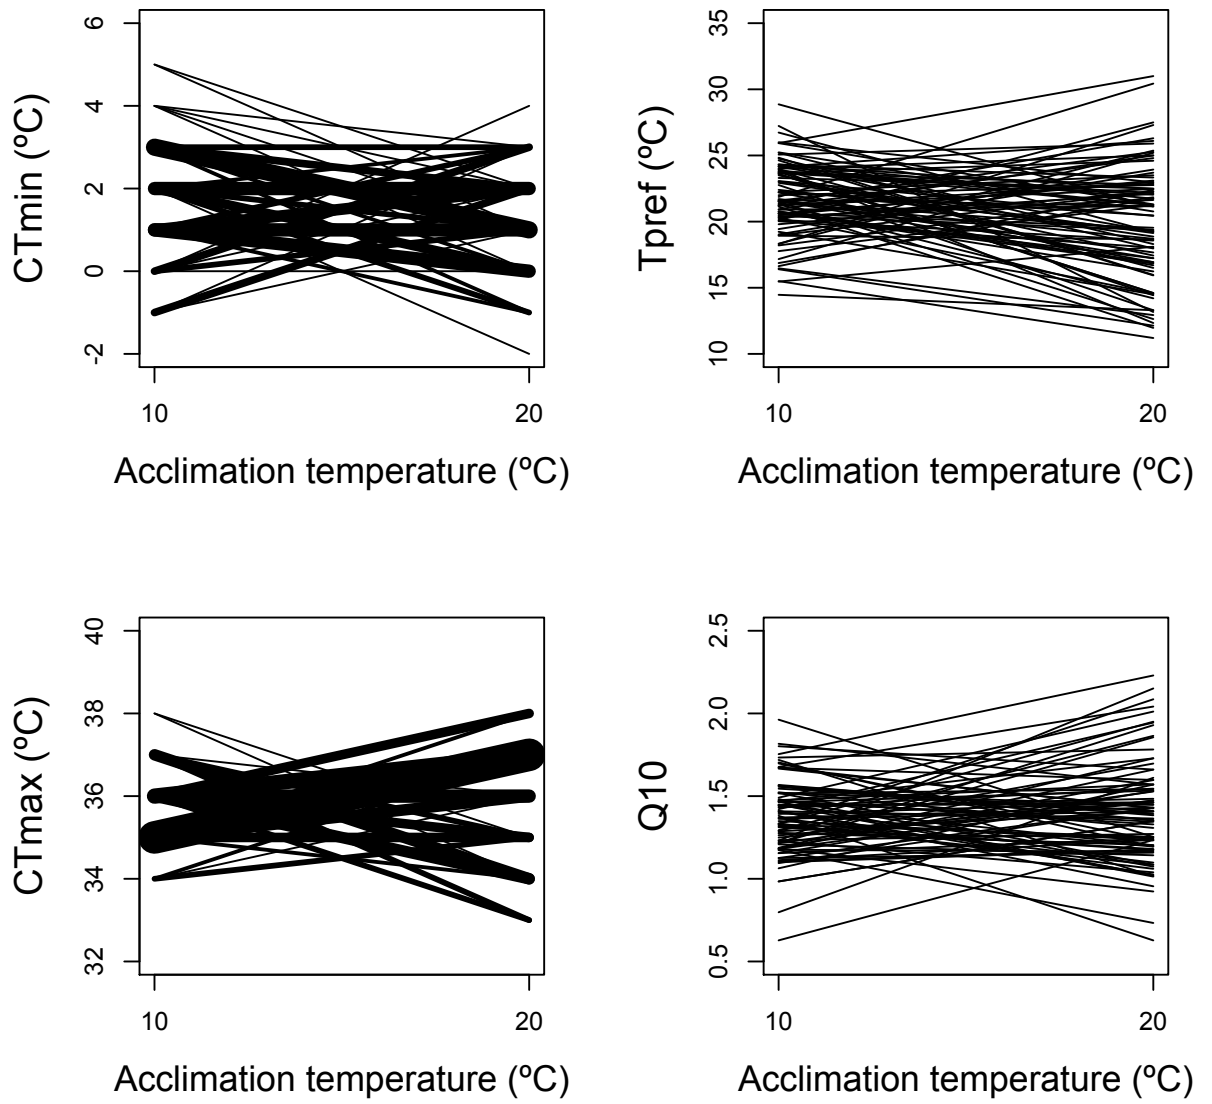

**Figure 4.** Survival estimates of simple directional selection sorted by model probabilities.

$w$ : Akaike weights of the model.

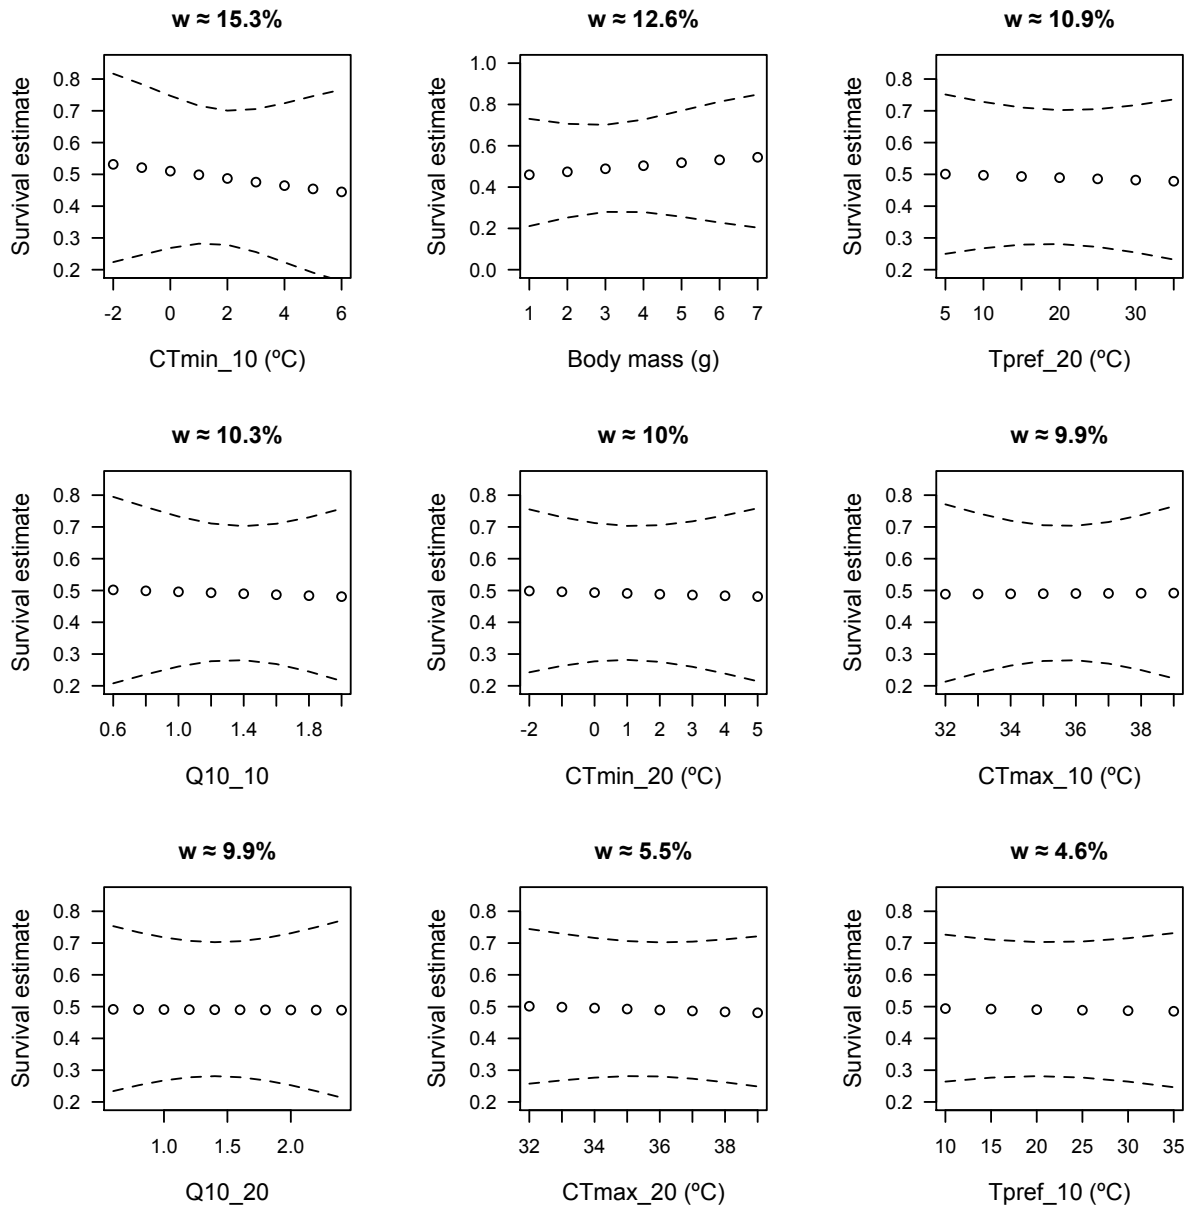

Source: https://www.biorxiv.org/content/10.1101/191825v6.full.pdf
